# Supplementary material for: Lanthanide complexes with phenanthroline-based ligands: insights into cell death mechanisms obtained by microscopy techniques
Source: Royal Society of Chemistry journal article supplement (doi:10.1039/c9dt00640k), 2019-01-01
Supplement: c9dt00640k1.pdf [file c9dt00640k1.pdf]

## Electronic Supplementary Information

### **Lanthanide complexes with phenanthroline-based ligands: insights into mechanisms of cell death by imaging tools**

Maria Paula Cabral Campello<sup>1\*</sup>, Elisa Palma<sup>1,2</sup>, Isabel Correia<sup>2</sup>, Pedro M. R. Paulo<sup>2</sup>, António Matos<sup>3</sup>, José Rino<sup>4</sup>, Joana Coimbra<sup>5</sup>, João Costa Pessoa<sup>2</sup>, Dinorah Gambino<sup>6</sup>, António Paulo<sup>1</sup>, Fernanda Marques<sup>1\*</sup>

<sup>1</sup>Centro de Ciências e Tecnologias Nucleares, Instituto Superior Técnico, Universidade de Lisboa, Estrada Nacional 10 (km 139.7), 2695-066 Bobadela LRS, Portugal

<sup>2</sup>Centro de Química Estrutural, Instituto Superior Técnico, Universidade de Lisboa, Av. Rovisco Pais, 1049-001 Lisboa, Portugal

<sup>3</sup>Centro de Investigação Interdisciplinar Egas Moniz, Campus Universitário, Quinta da Granja, Monte de Caparica, Almada, Portugal

<sup>4</sup>Faculdade de Medicina da Universidade de Lisboa, Instituto de Medicina Molecular Faculdade de Medicina de Lisboa Av. Prof. Egas Moniz 1649-028 Lisboa, Portugal

<sup>5</sup>Laboratório Central de Análises, Universidade de Aveiro, 3810-193 Aveiro, Portugal

<sup>6</sup>Cátedra de Química Inorgánica, Facultad de Química, Universidad de la República, 11800 Montevideo, Uruguay

Corresponding authors:

[fmarujo@ctn.tecnico.ulisboa.pt](mailto:fmarujo@ctn.tecnico.ulisboa.pt)

[pcampelo@ctn.tecnico.ulisboa.pt](mailto:pcampelo@ctn.tecnico.ulisboa.pt)

\*These authors contributed equally to this work

## [Sm(DBM)<sub>3</sub>(Phen)] (1)

Anal. Calc. for :C<sub>57</sub>H<sub>41</sub>N<sub>2</sub>O<sub>6</sub>Sm: C,68.44; H,4.13; N, 2.80%; Found C, 68.40; H, 4.43; N, 2,83%.

**IR (KBr,  $\nu/\text{cm}^{-1}$ )** : 3056 (w), 1595(s), 1551 (s) 1518 (s), 1478 (s), 1458 (m), 1411(s), 1311 (m), 1284 (m,sh), 1220 (m), 1178 (w), 1067 (w), 1023 (m), 941 (w), 783 (w), 750 (m,sh), 721 (s), 689 (m), 521 (w), 426 (w).

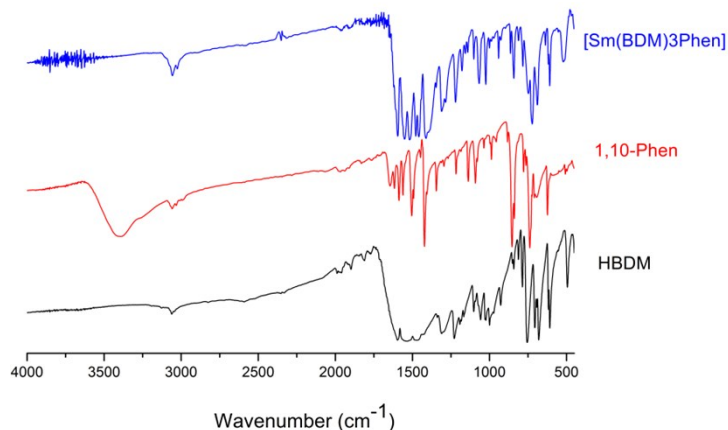

Figure S1. IR spectra of **1** and the co-ligands, 1,10-Phen and HDBM, in the region 4000-400cm<sup>-1</sup>.

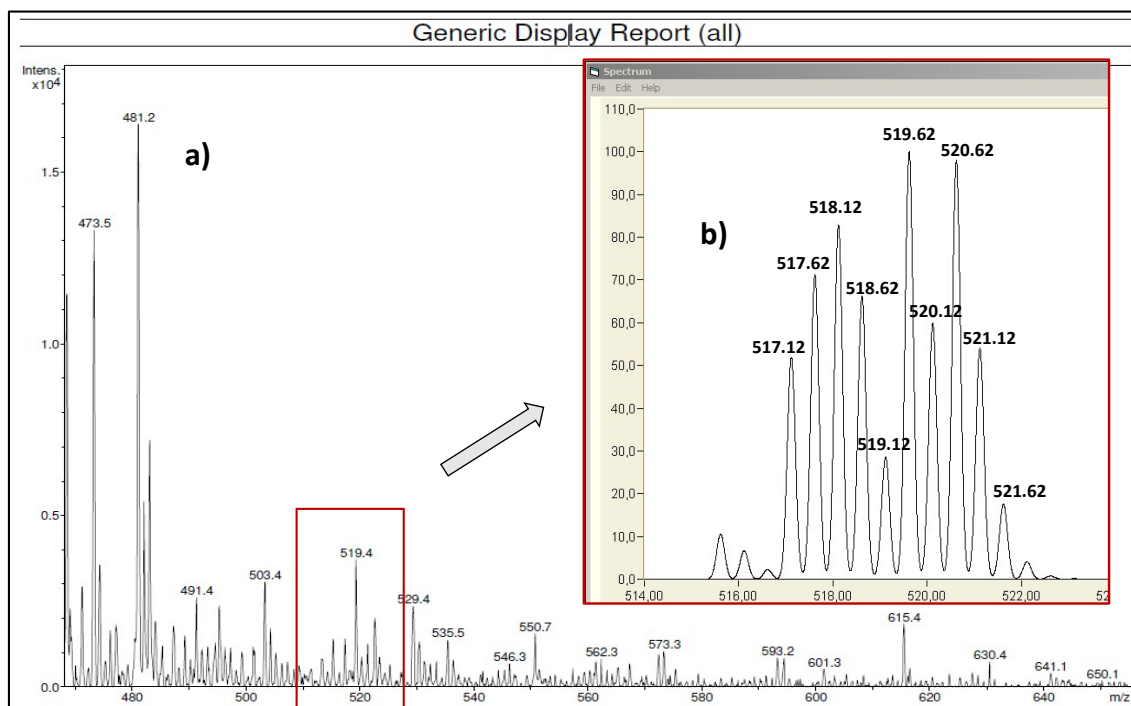

Figure S2. Characterization of [Sm(DBM)<sub>3</sub>(Phen)] by mass spectrometry: **a)** experimental molecular-ion ([M+2H<sub>2</sub>O]<sup>2+</sup>); **b)** calculated [M+2H<sub>2</sub>O]<sup>2+</sup>.

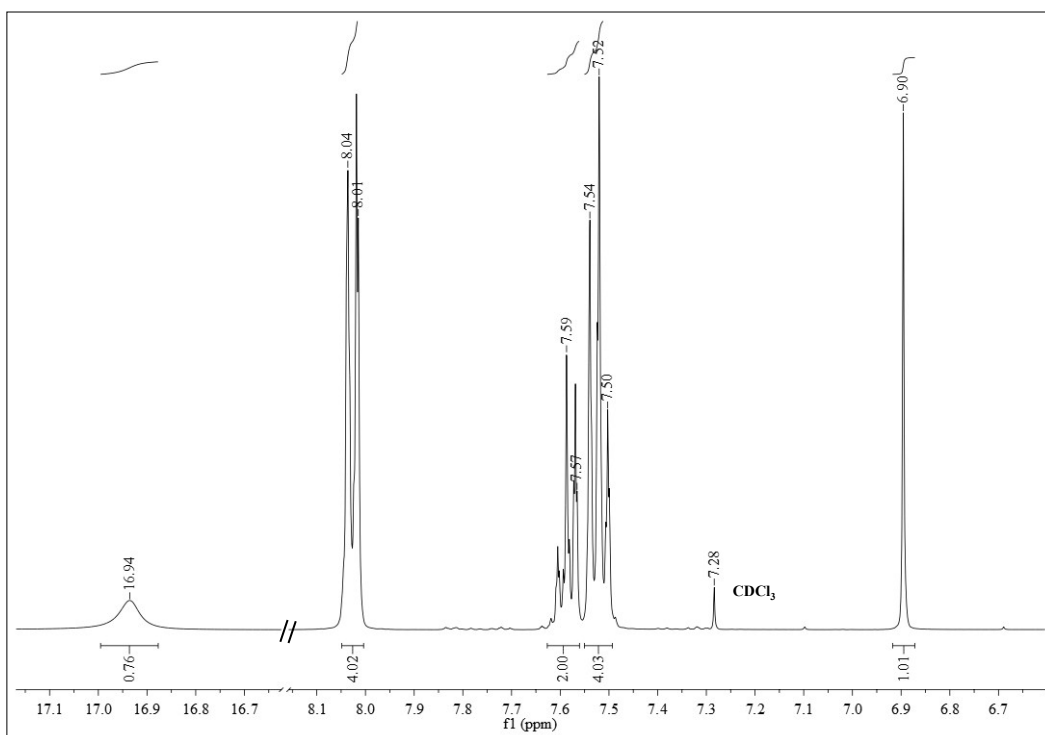

Figure S3.  $^1\text{H}$  NMR (400 MHz,  $\text{CDCl}_3$ ) of HDBM free ligand.

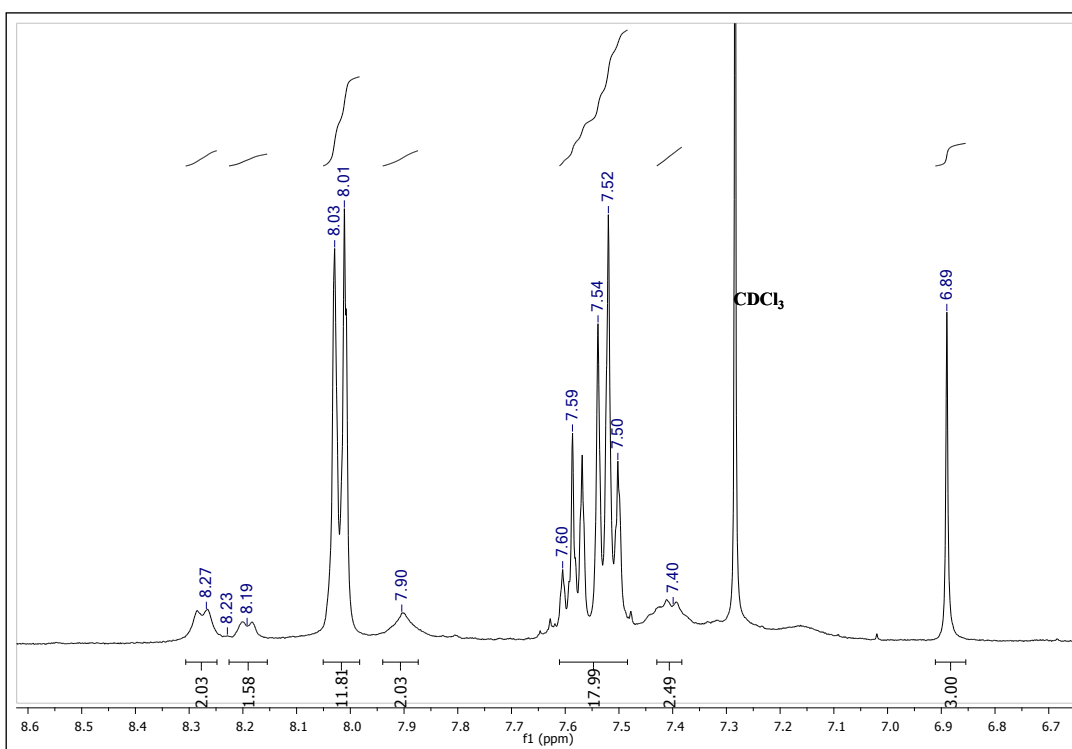

Figure S4.  $^1\text{H}$  NMR (400 MHz,  $\text{CDCl}_3$ ) of  $[\text{Sm}(\text{DBM})_3(\text{Phen})]$  in  $\text{CDCl}_3$ , and inset of zoom from 8.5 to 6.8 ppm.  $^1\text{H}$  NMR in  $\text{CDCl}_3$  ( $\delta$ , ppm) 8.27 (d, 2H, Phen), 8.20 (d, 2H, Phen), 8.03 (d,  $J = 7.0$  Hz, 12H, *o*-Ph), 7.90 (d,  $J = 7.2$  Hz, 2H, Phen), 7.60-7.50 (m, 18H, *m*-Ph and *p*-Ph), 7.41 (d,  $J = 7.2$  Hz, 2H, Phen), 6.89 (s, 3H, CH).

## [Sm(DBM)<sub>3</sub>NH<sub>2</sub>Phen] (2)

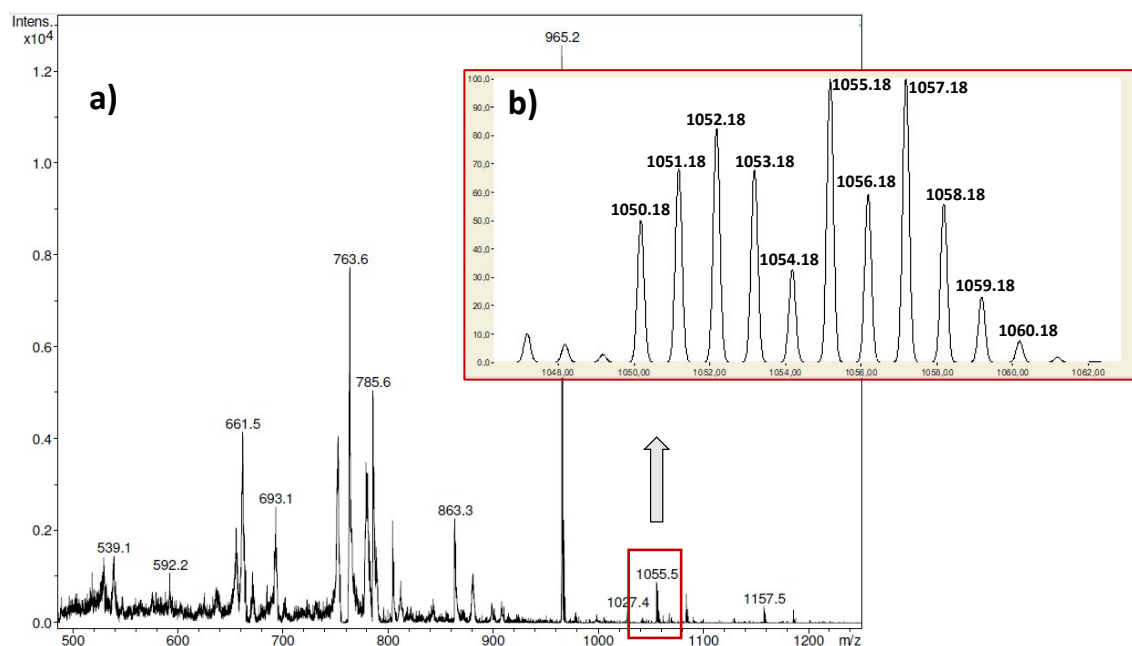

Figure S5. Characterization of [Sm(DBM)<sub>3</sub>NH<sub>2</sub>Phen] by mass spectrometry: **a)** experimental molecular-ion ( $[M+K]^+$ ); **b)** calculated  $[M+K]^+$ .

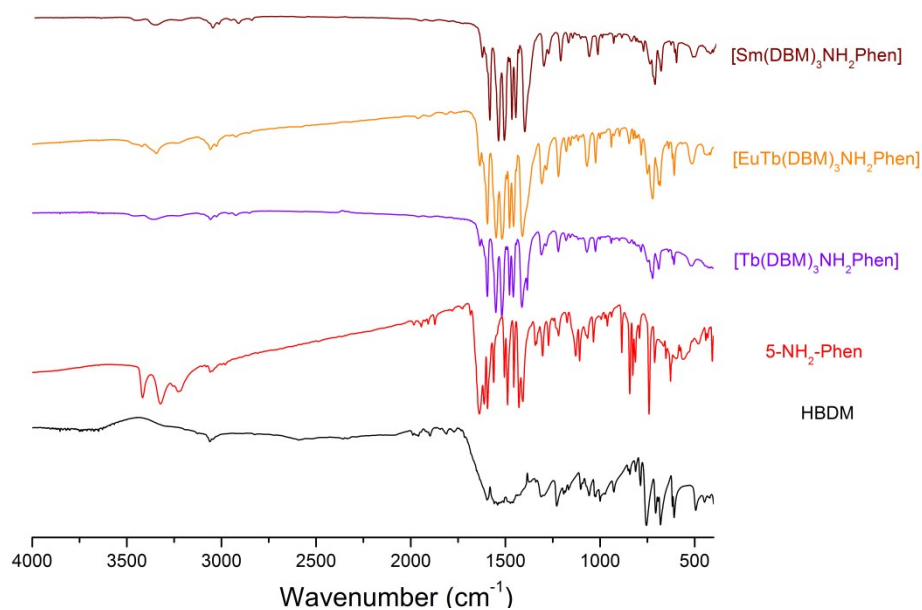

Figure S6. IR spectra of 2, 3, 4 and the co-ligands 5-NH<sub>2</sub>Phen and HDBM, in the region 4000-400 $\text{cm}^{-1}$ .

Table S1. Selected IR bands assignment of HDBM, NH<sub>2</sub>Phen and its lanthanide complexes (cm<sup>-1</sup>)

|                               | HDBM | 5 NH <sub>2</sub> Phen | 1        | 2       | 3        | 4        |
|-------------------------------|------|------------------------|----------|---------|----------|----------|
| $\nu$ C-C                     | 1598 | 1616                   | 1595     | 1594    | 1594     | 1595     |
| $\nu_a$ C=C-C=O               | 1540 | -                      | 1518     | 1516    | 1518     | 1518     |
| $\nu_a$ O-C=C-C               | 1474 | -                      | 1480     | 1456    | 1458     | 1458     |
| $\nu$ C=N                     | -    | 1428, 1407             | 1411     | 1409    | 1409     | 1411     |
| $\nu$ C-N (CNH <sub>2</sub> ) | -    | 1303                   | 1311     | 1310    | 1308     | 1309     |
| $\delta$ CH $\alpha$          | 1229 | -                      | 1220     | 1220    | 1219     | 1220     |
| $\gamma$ CH+ $\pi$ (C H)      | 756  | 741                    | 750, 722 | 743,722 | 749, 721 | 747, 722 |
| Ln-O                          | -    | -                      | 521      | 520     | 513      | 522      |

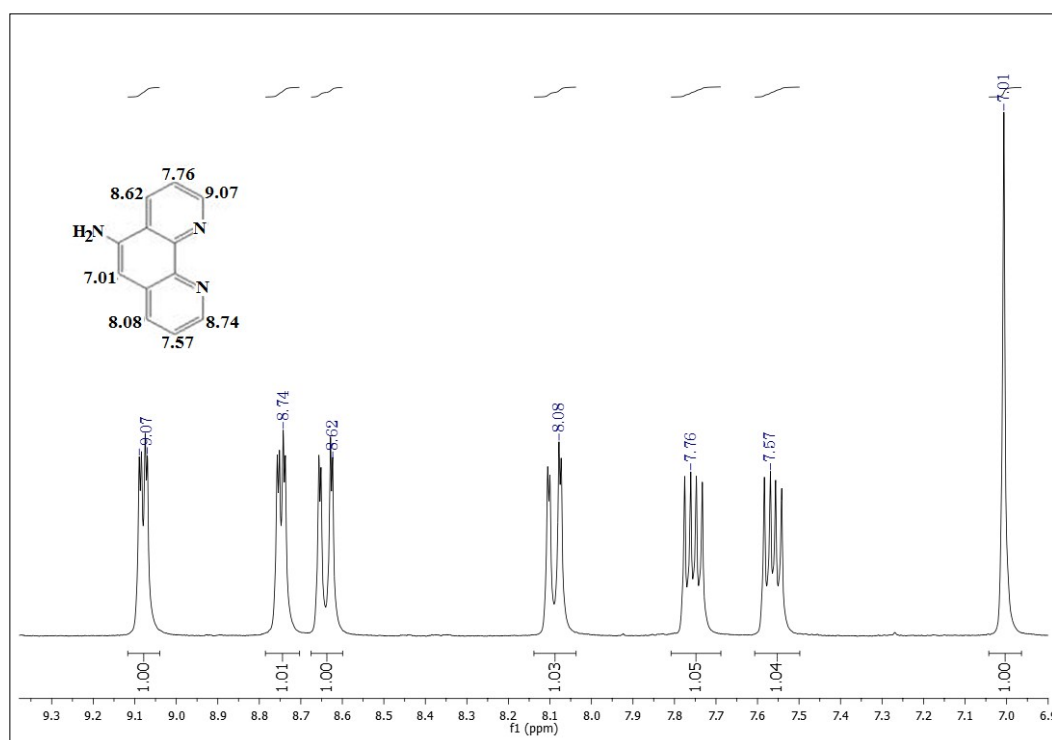

Figure S7. <sup>1</sup>H NMR (400 MHz, CD<sub>3</sub>OD) of 5-NH<sub>2</sub> Phen in CD<sub>3</sub>OD.

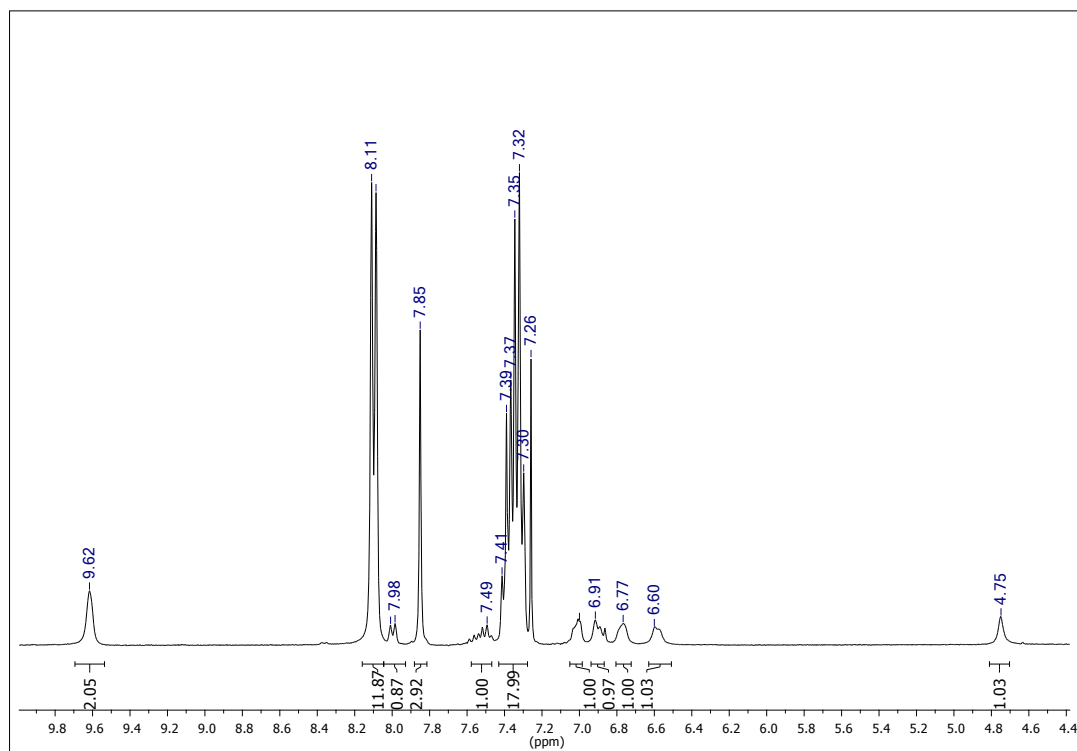

Figure S8.  $^1\text{H}$  NMR (400 MHz,  $\text{CDCl}_3$ ) [ $\text{Sm}(\text{DBM})_3\text{NH}_2\text{Phen}$ ]

**[ $\text{Eu}(\text{DBM})_3\text{NH}_2\text{Phen}$ ] (3)**

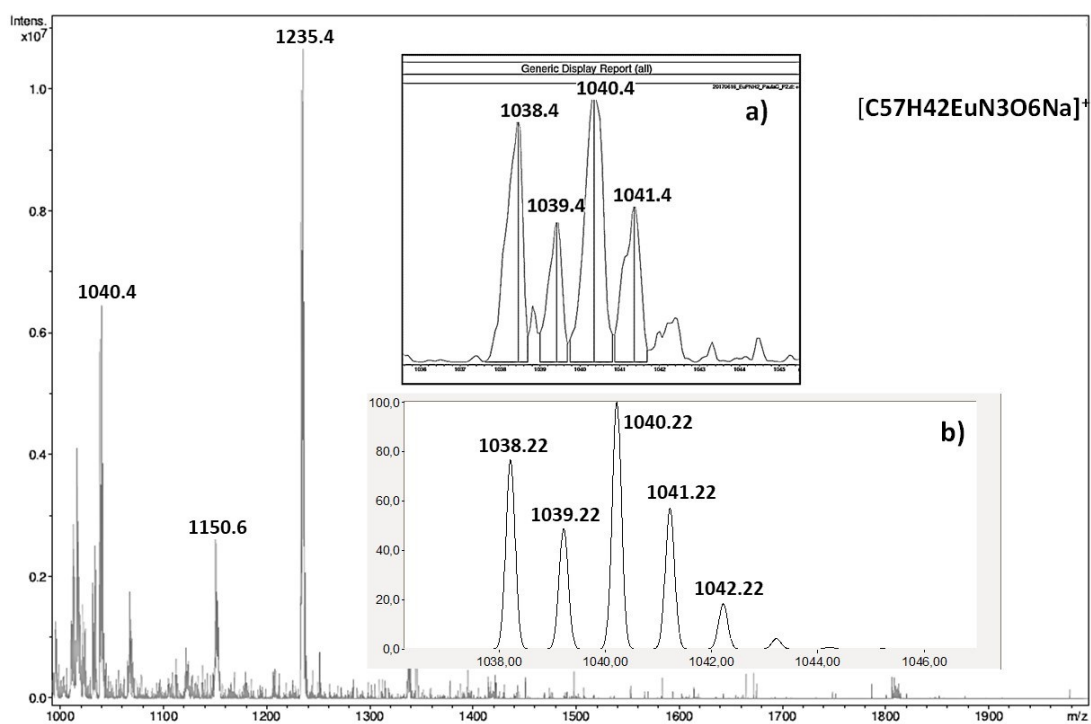

Figure S9. Characterization of [ $\text{Eu}(\text{DBM})_3\text{NH}_2\text{Phen}$ ] by mass spectrometry: **a)** experimental molecular-ion ( $[\text{M}+\text{Na}]^+$ ); **b)** calculated  $[\text{M}+\text{Na}]^+$ .

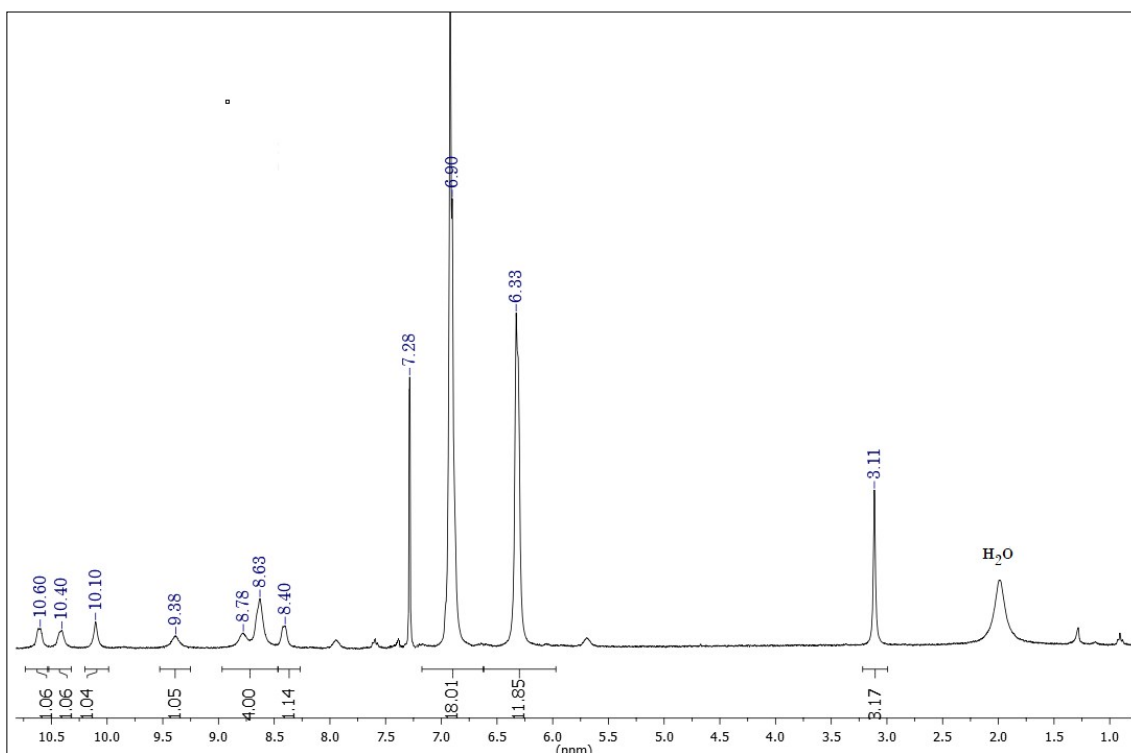

Figure S10.  $^1\text{H}$  NMR (400 MHz,  $\text{CDCl}_3$ ) of  $[\text{Eu}(\text{DBM})_3\text{NH}_2\text{Phen}]$ .

**$[\text{Tb}(\text{DBM})_3\text{NH}_2\text{Phen}]$  (4)**

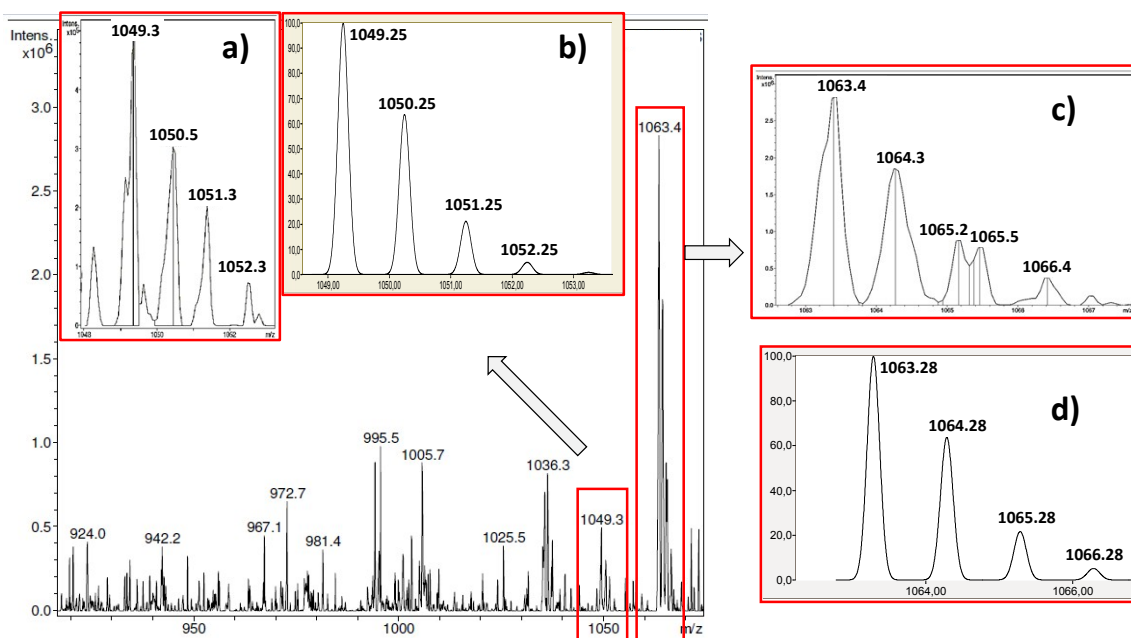

Figure S11. Characterization of  $[\text{Tb}(\text{DBM})_3\text{NH}_2\text{Phen}]$  by mass spectrometry: **a)** experimental molecular-ion ( $[\text{M}+\text{Na}]^+$ ; **b)** calculated  $[\text{M}+\text{Na}]^+$ ; **c)** experimental molecular-ion  $[\text{M}+\text{H}+2\text{H}_2\text{O}]^+$ ; **d)** calculated  $[\text{M}+\text{H}+2\text{H}_2\text{O}]^+$ .

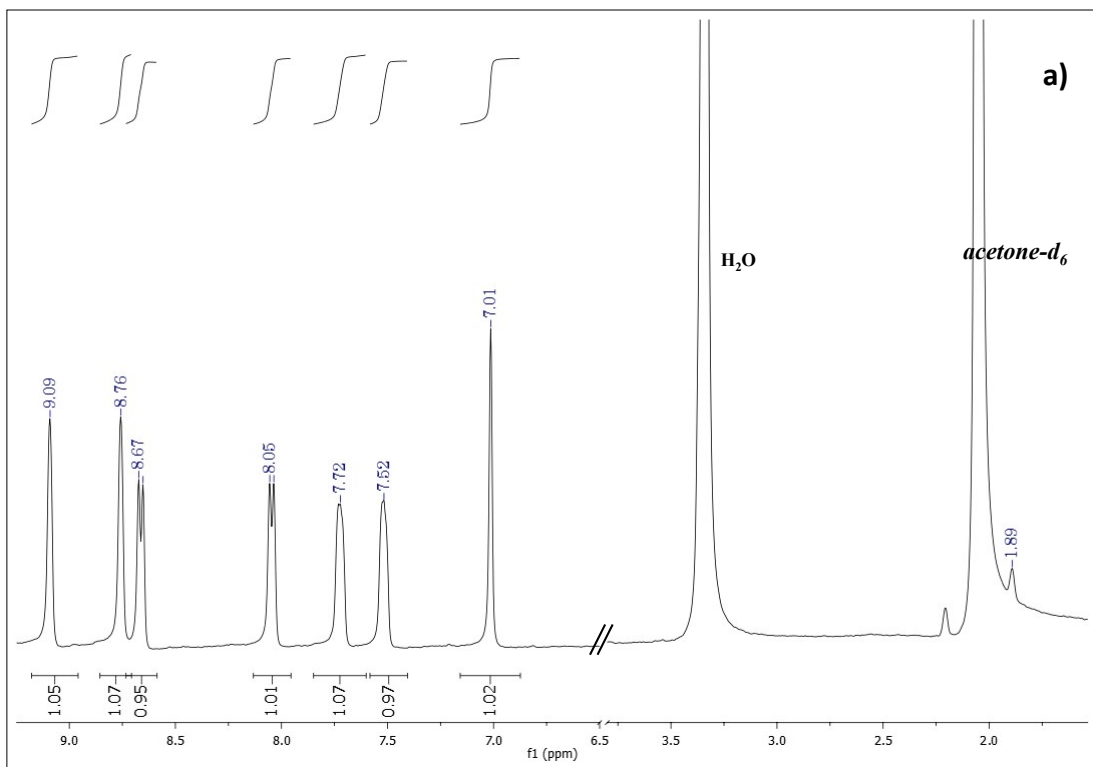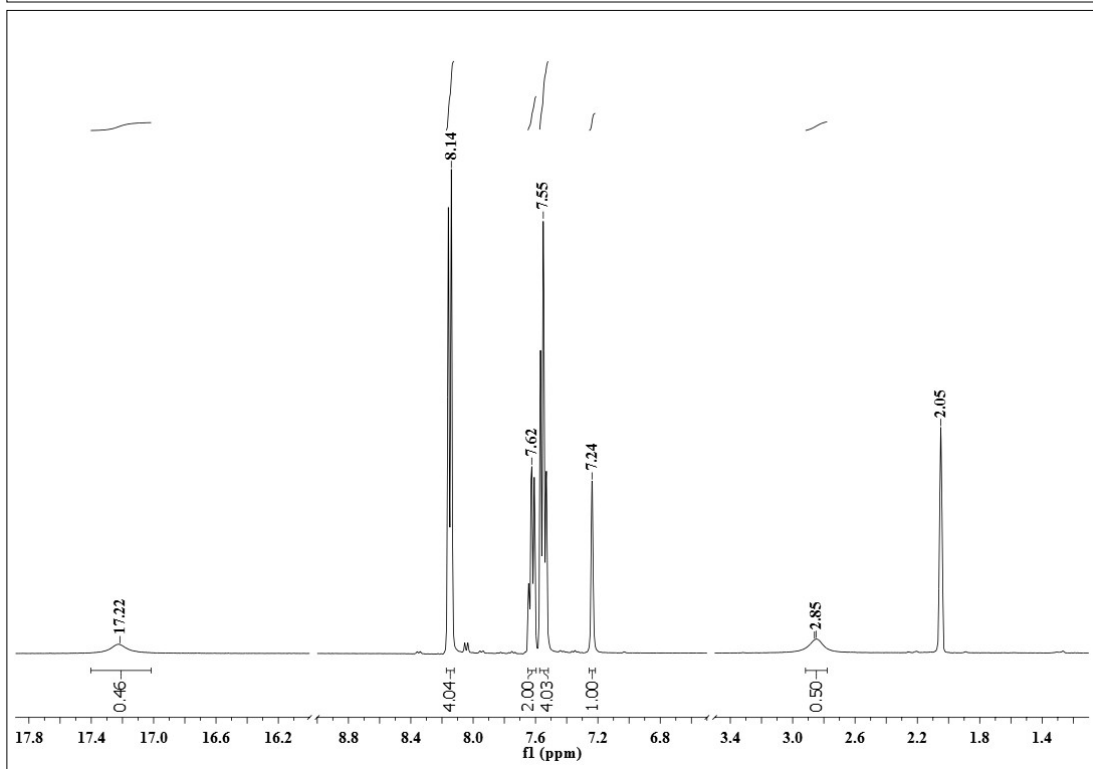

Fi

Figure S12. <sup>1</sup>H NMR free ligands (400 MHz, Acetone-*d*<sub>6</sub>) **a)** 5-NH<sub>2</sub>Phen; **b)** HDBM.



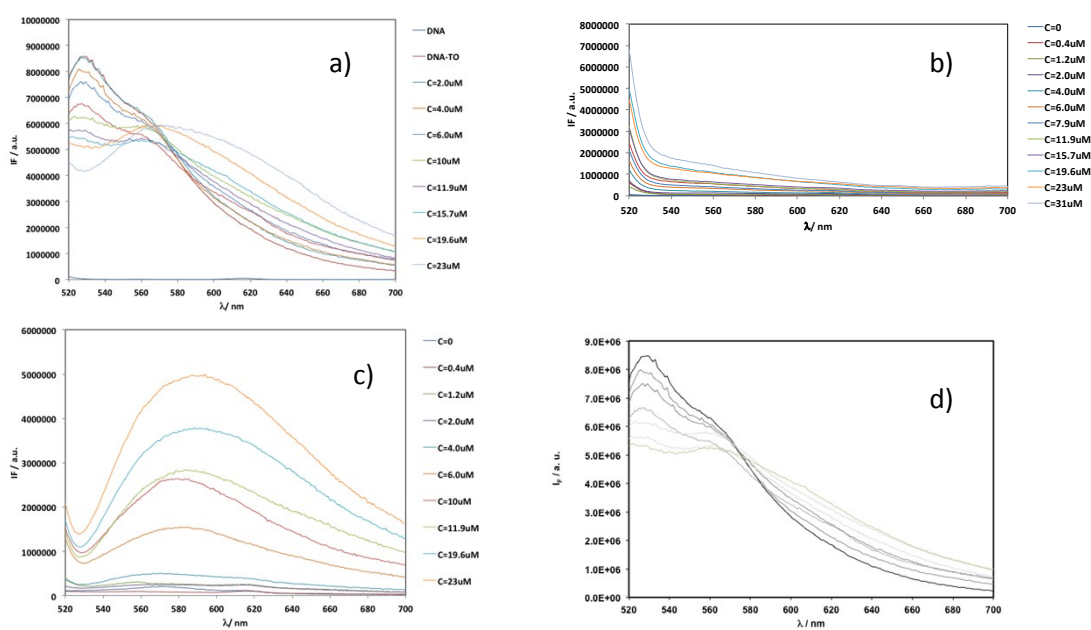

Figure S13A - Fluorescence emission spectra measured for solutions containing a) 2.0  $\mu\text{M}$  of *ctDNA*, a molar ratio of TO:*ctDNA* = 0.8 and using  $[\text{Sm}(\text{DBM})_3(\text{NH}_2\text{Phen})]$  concentrations from 0 to 23  $\mu\text{M}$ ; b)  $[\text{Sm}(\text{DBM})_3(\text{NH}_2\text{Phen})]$  from 0 to 23  $\mu\text{M}$ ; c) 1.6  $\mu\text{M}$  of TO and  $[\text{Sm}(\text{DBM})_3(\text{NH}_2\text{Phen})]$  concentrations from 0 to 23  $\mu\text{M}$ ; d) 2.0  $\mu\text{M}$  of *ctDNA*, a molar ratio of TO:*ctDNA* = 0.8 and using  $[\text{Sm}(\text{DBM})_3(\text{NH}_2\text{Phen})]$  concentrations from 0 to 23  $\mu\text{M}$ , after subtraction of the corresponding spectra included in c).

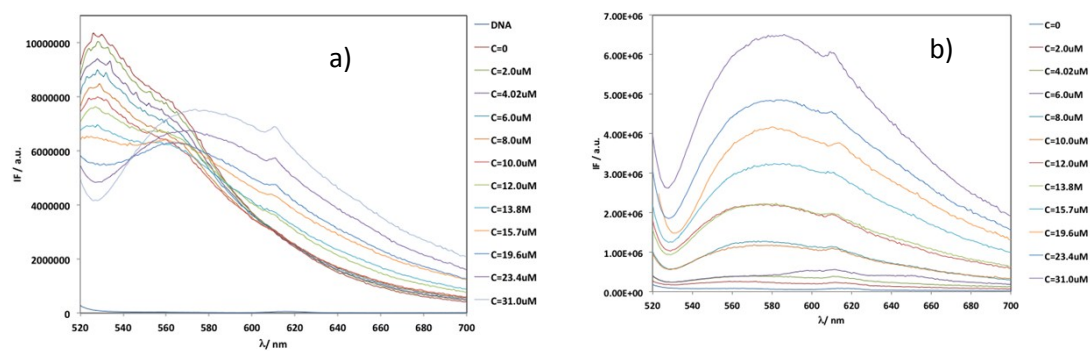

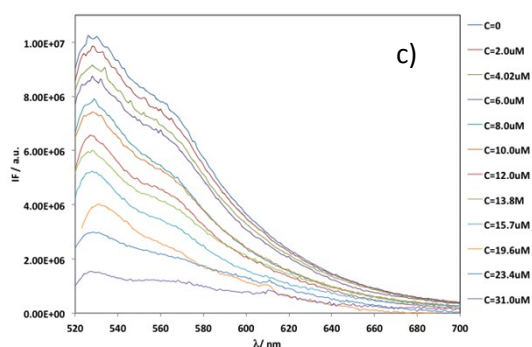

Figure S13B - Fluorescence emission spectra measured for solutions containing a) 2.0  $\mu\text{M}$  of *ctDNA*, a molar ratio of TO:*ctDNA* = 0.8 and using  $[\text{Eu}(\text{DBM})_3(\text{NH}_2\text{Phen})]$  concentrations from 0 to 31  $\mu\text{M}$ . b) 1.6  $\mu\text{M}$  of TO and  $[\text{Eu}(\text{DBM})_3(\text{NH}_2\text{Phen})]$  concentrations from 0 to 31  $\mu\text{M}$ ; d) 2.0  $\mu\text{M}$  of *ctDNA*, a molar ratio of TO:*ctDNA* = 0.8 and using  $[\text{Eu}(\text{DBM})_3(\text{NH}_2\text{Phen})]$  concentrations from 0 to 31  $\mu\text{M}$ , after subtraction of the corresponding spectra included in b)

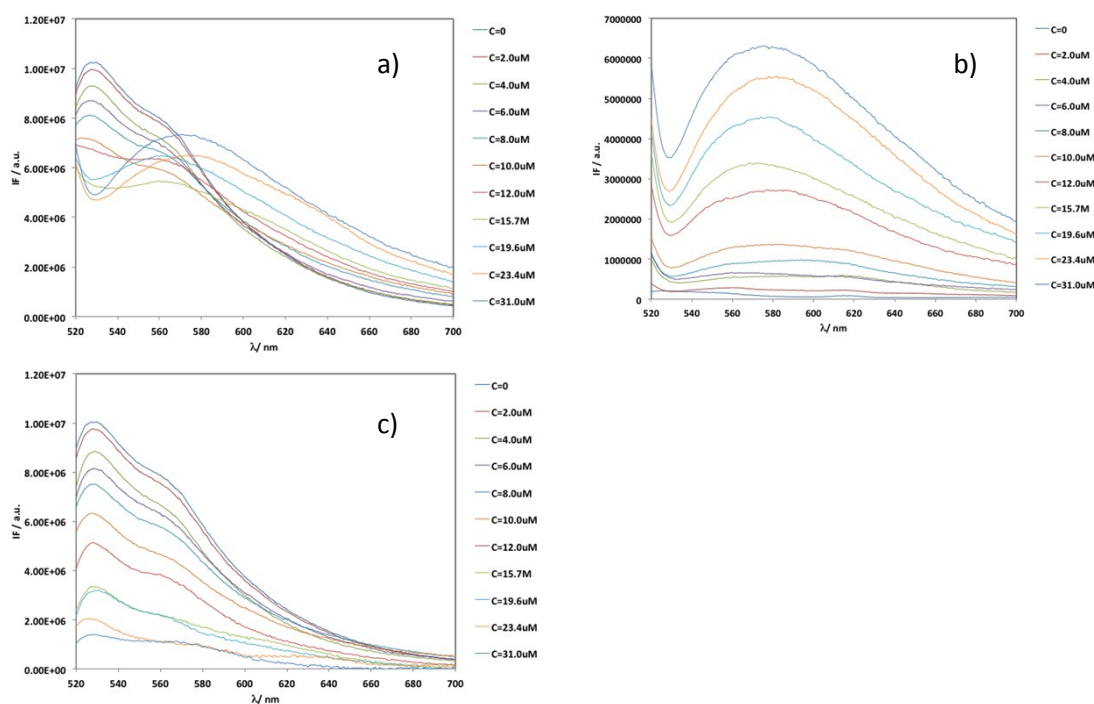

Figure S13C - Fluorescence emission spectra measured for solutions containing a) 2.0  $\mu\text{M}$  of *ctDNA*, a molar ratio of TO:*ctDNA* = 0.8 and using  $[\text{Tb}(\text{DBM})_3(\text{NH}_2\text{Phen})]$  concentrations from 0 to 31  $\mu\text{M}$ . b) 1.6  $\mu\text{M}$  of TO and  $[\text{Tb}(\text{DBM})_3(\text{NH}_2\text{Phen})]$  concentrations from 0 to 31  $\mu\text{M}$ ; c) 2.0  $\mu\text{M}$  of *ctDNA*, a molar ratio of TO:*ctDNA* = 0.8 and using  $[\text{Tb}(\text{DBM})_3(\text{NH}_2\text{Phen})]$  concentrations from 0 to 31  $\mu\text{M}$ , after subtraction of the corresponding spectra included in b).

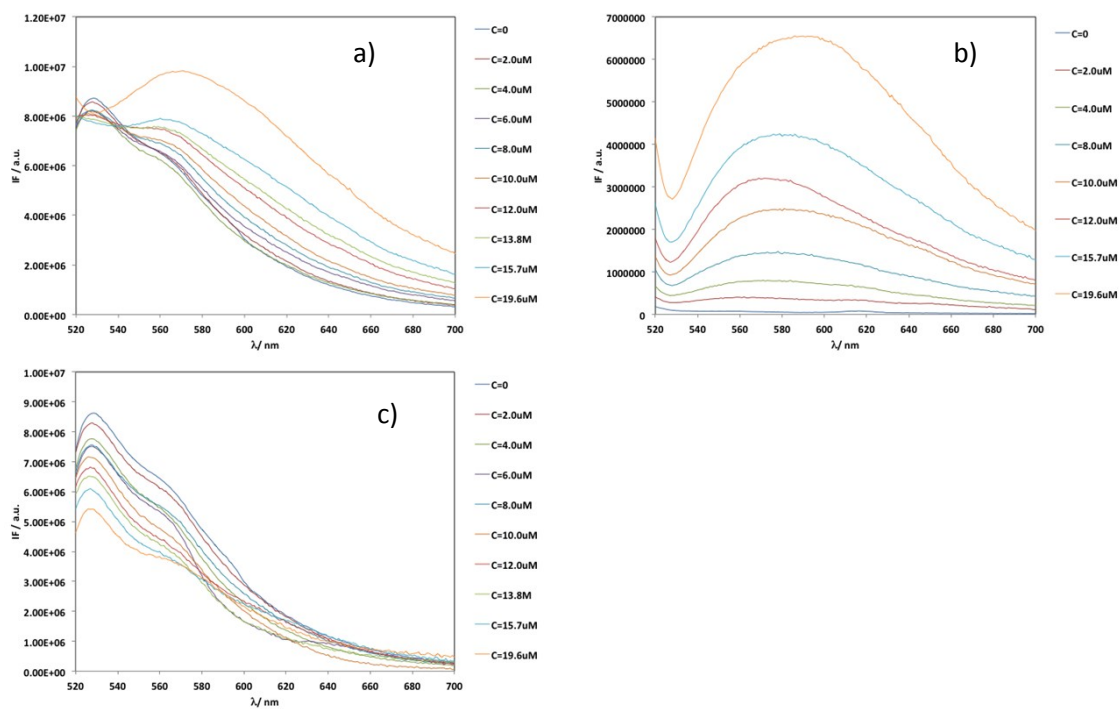

Figure S13D - Fluorescence emission spectra measured for solutions containing a) 2.0 μM of *ctDNA*, a molar ratio of TO:*ctDNA* = 0.8 and using [Sm(DBM)<sub>3</sub>(Phen)] concentrations from 0 to 20 μM. b) 1.6 μM of TO and [Sm(DBM)<sub>3</sub>(Phen)] concentrations from 0 to 20 μM; c) 2.0 μM of *ctDNA*, a molar ratio of TO:*ctDNA* = 0.8 and using [Sm(DBM)<sub>3</sub>(Phen)] concentrations from 0 to 20 μM, after subtraction of the corresponding spectra included in b).

A

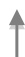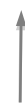

B

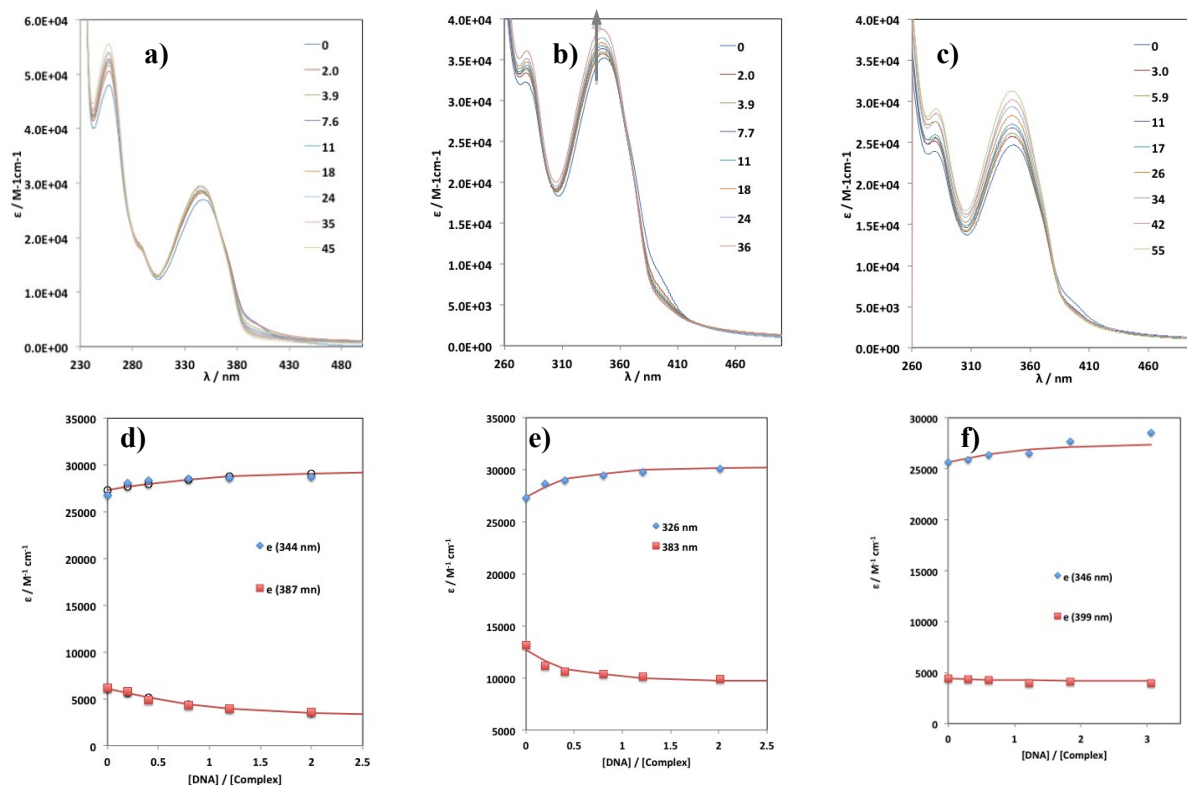

Figure S14. A) UV-vis spectra measured for the titration of solutions of the complexes,  $1.0 \times 10^{-5} \text{M}$ , with increasing amounts of ctDNA after correction for the dilution (concentrations indicated in the legend in  $\mu\text{M}$ , arrows indicate changes with DNA addition). The same amount of DNA was added in the reference cuvette. a)  $[\text{Sm}(\text{DBM})_3(\text{Phen})]$ , b)  $[\text{Eu}(\text{DBM})_3(\text{NH}_2\text{Phen})]$  and c)  $[\text{Tb}(\text{DBM})_3(\text{NH}_2\text{Phen})]$ . B) Variation of the molar absorptivity at selected wavelengths with  $[\text{DNA}]/[\text{complex}]$  ratios. d)  $[\text{Sm}(\text{DBM})_3(\text{Phen})]$ , e)  $[\text{Eu}(\text{DBM})_3(\text{NH}_2\text{Phen})]$  and f)  $[\text{Tb}(\text{DBM})_3(\text{NH}_2\text{Phen})]$ . The curves in red show the fitted model to determine binding constants of Ln complexes with DNA, as described in the text.

The results shown in Fig. S14d-f were fitted assuming the formation of a 1:1 association complex between the DNA and Ln complexes,

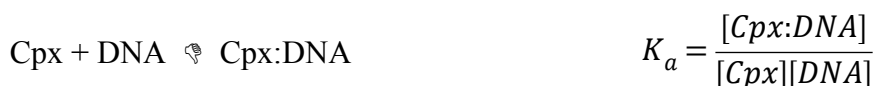

The total concentration of DNA and of Ln complex are the sum of the concentrations of free and associated forms, respectively,

$$C_{\text{DNA}} = [\text{DNA}] + [\text{Cpx:DNA}] \quad (1)$$

$$C_{\text{Cpx}} = [\text{Cpx}] + [\text{Cpx:DNA}] \quad (2)$$

and these can be used to rewrite the concentration of associated form as a function of the total concentrations,  $C_{\text{DNA}}$  and  $C_{\text{Cpx}}$ , and of the binding constant,  $K_a$ ,

$$[Cpx:DNA] = \frac{1}{2} \left( C_{DNA} + C_{Cpx} + \frac{1}{K_a} \right) - \frac{1}{2} \sqrt{\left( C_{DNA} + C_{Cpx} + \frac{1}{K_a} \right)^2 - 4 \cdot C_{DNA} \cdot C_{Cpx}} \quad (3)$$

The apparent molar absorptivity of a given solution of Ln complex and DNA is obtained from the molar fraction average of the molar absorptivity of the individual species,

$$\bar{\varepsilon}^\lambda = \frac{[Cpx]}{C_{Cpx}} \varepsilon_{Cpx}^\lambda + \frac{[Cpx:DNA]}{C_{Cpx}} \varepsilon_{Cpx:DNA}^\lambda \quad (4)$$

The experimental results in Fig. S14d-f were fitted using equations 2, 3 and 4 by adjusting the parameter values of molar absorptivity of the individual species  $\varepsilon_{Cpx}^\lambda$  and  $\varepsilon_{Cpx:DNA}^\lambda$  at each wavelength selected and the value of the binding constant,  $K_a$ , for each Ln complex studied – Table S2.

Table S2. Values of the binding constant ( $K_a$ ) for the association of Ln complexes with ctDNA obtained from fitting the variation of molar absorptivity from the UV-Vis absorption data.

|                                               |          | $K_a$ ( $M^{-1}$ ) |
|-----------------------------------------------|----------|--------------------|
| [Sm(DBM) <sub>3</sub> (Phen)]                 | <b>1</b> | $4.21 \times 10^5$ |
| [Sm(DBM) <sub>3</sub> (NH <sub>2</sub> Phen)] | <b>2</b> | $3.21 \times 10^5$ |
| [Eu(DBM) <sub>3</sub> (NH <sub>2</sub> Phen)] | <b>3</b> | $4.41 \times 10^5$ |
| [Tb(DBM) <sub>3</sub> (NH <sub>2</sub> Phen)] | <b>4</b> | $3.10 \times 10^5$ |

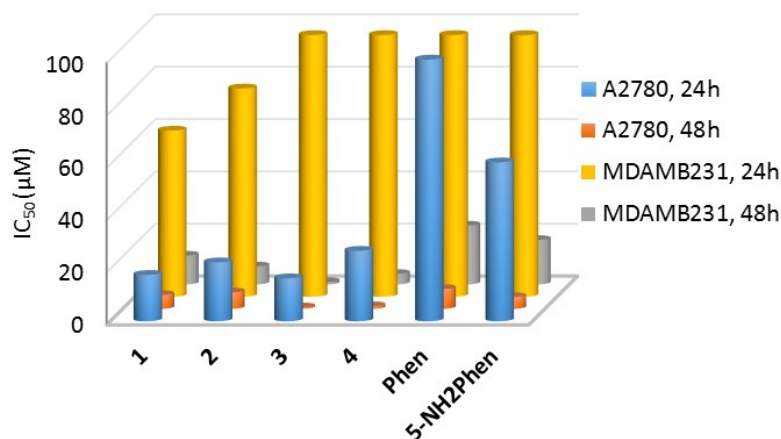

Figure S15. IC<sub>50</sub> values obtained for the ligands and the lanthanide complexes after 24 h and 48 h incubation using the MTT assay.

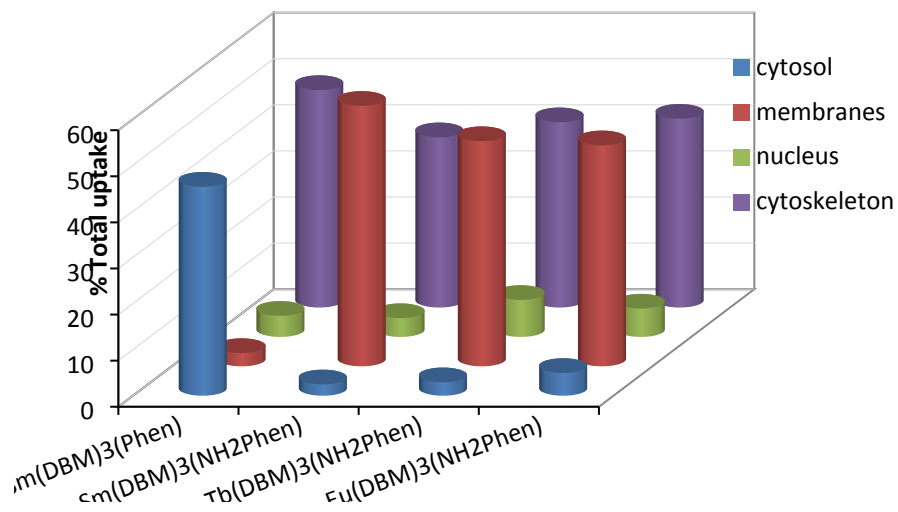

Figure S16. Percent total cellular uptake of the lanthanide complexes (metal content) in the A2780 cellular fractions.
